# Supplementary material for: Tunable electronic structure of heterosite FePO4: an in-depth structural study and polaron transport
Source: Royal Society of Chemistry journal article supplement (doi:10.1039/d3ra01366a), 2023-01-01
Supplement: d3ra01366a1.pdf [file d3ra01366a1.pdf]

## *Electronic Supplementary Information (ESI):*

### **Tunable Electronic Structure of *heterosite* FePO<sub>4</sub>: An In-depth Structural Study and Polaron Transport**

**Azeem Banday<sup>†</sup>, Raza Shahid<sup>‡</sup>, Mukul Gupta<sup>§</sup> and Sevi Murugavel<sup>†\*</sup>**

<sup>†</sup>*Department of Physics & Astrophysics, University of Delhi, Delhi-110007, India*

<sup>‡</sup>*Department of Physics, Jamia Millia Islamia, New Delhi-110025, India*

<sup>§</sup>*UGC-DAE Consortium for Scientific Research, University Campus, Khandwa Road, Indore*

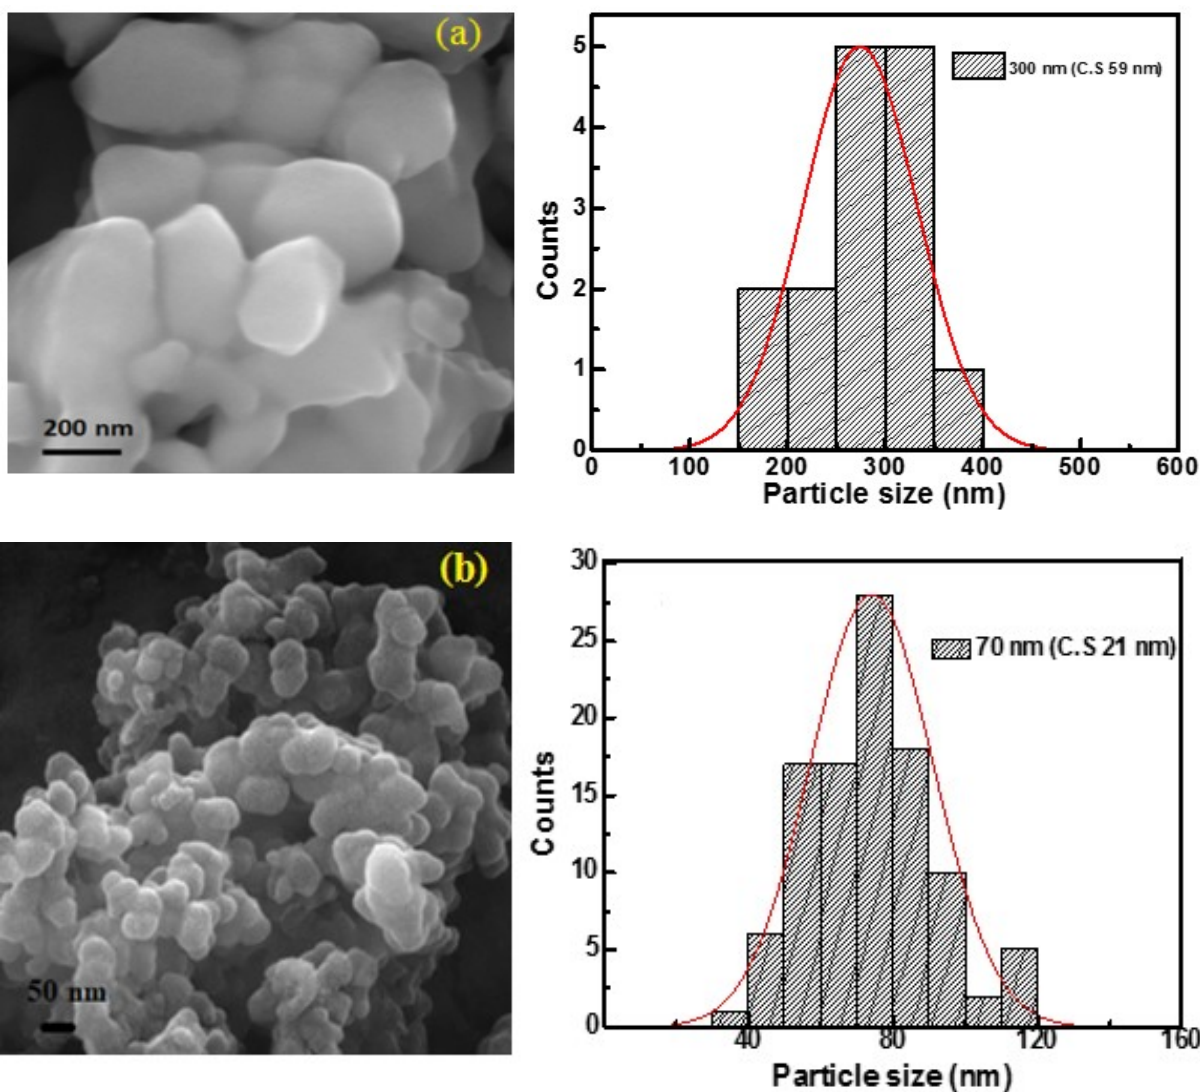

**Figure S1:-** FESEM images along with its particle size distribution histogram of (a) 59 nm, and (b) 21 nm crystallite sizes of h-FP.

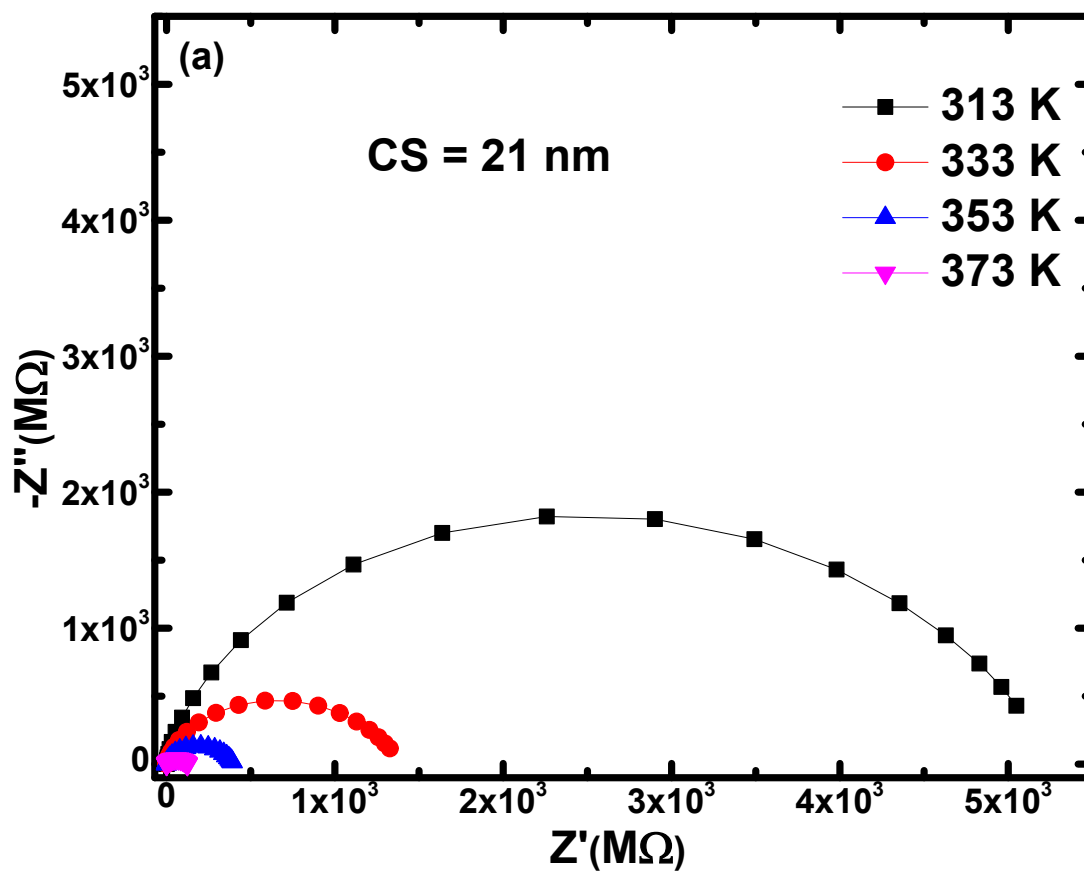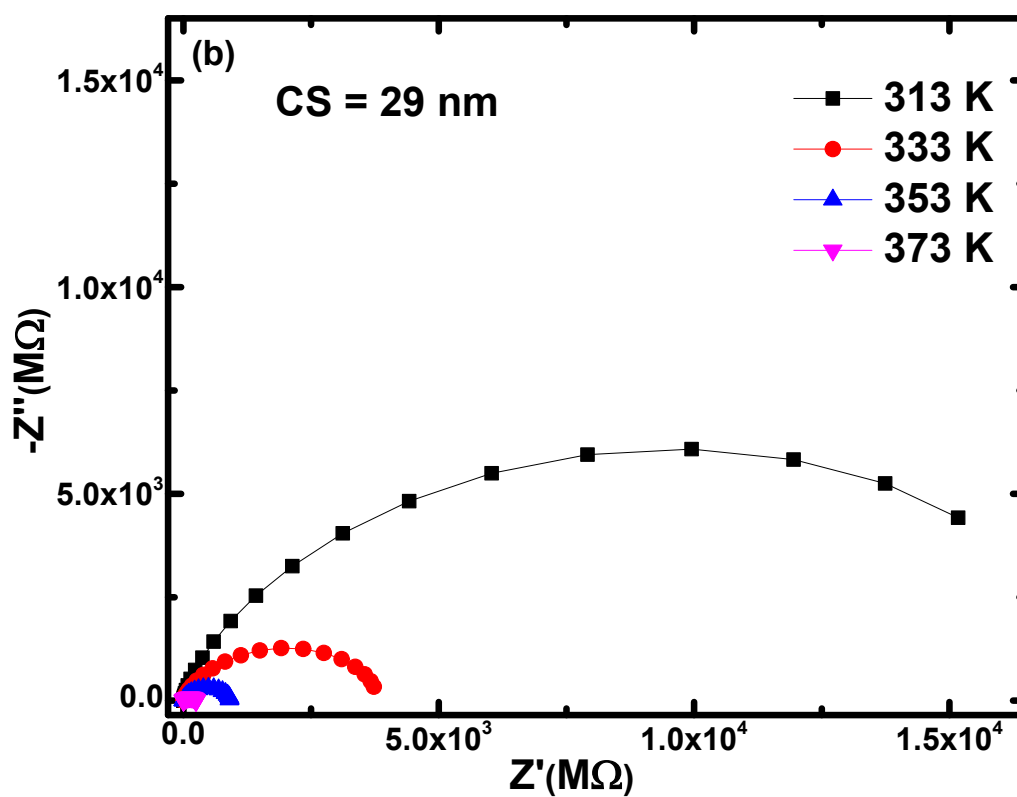

Figure S2: Nyquist plot of (a) 21 nm and (b) 29 nm crystallite size h-FP samples.
